# Supplementary material for: Normal Table of Xenopus development: a new graphical resource
Source: Oxford University Press journal article supplement (doi:10.1242/dev.200356), 2022-07-14

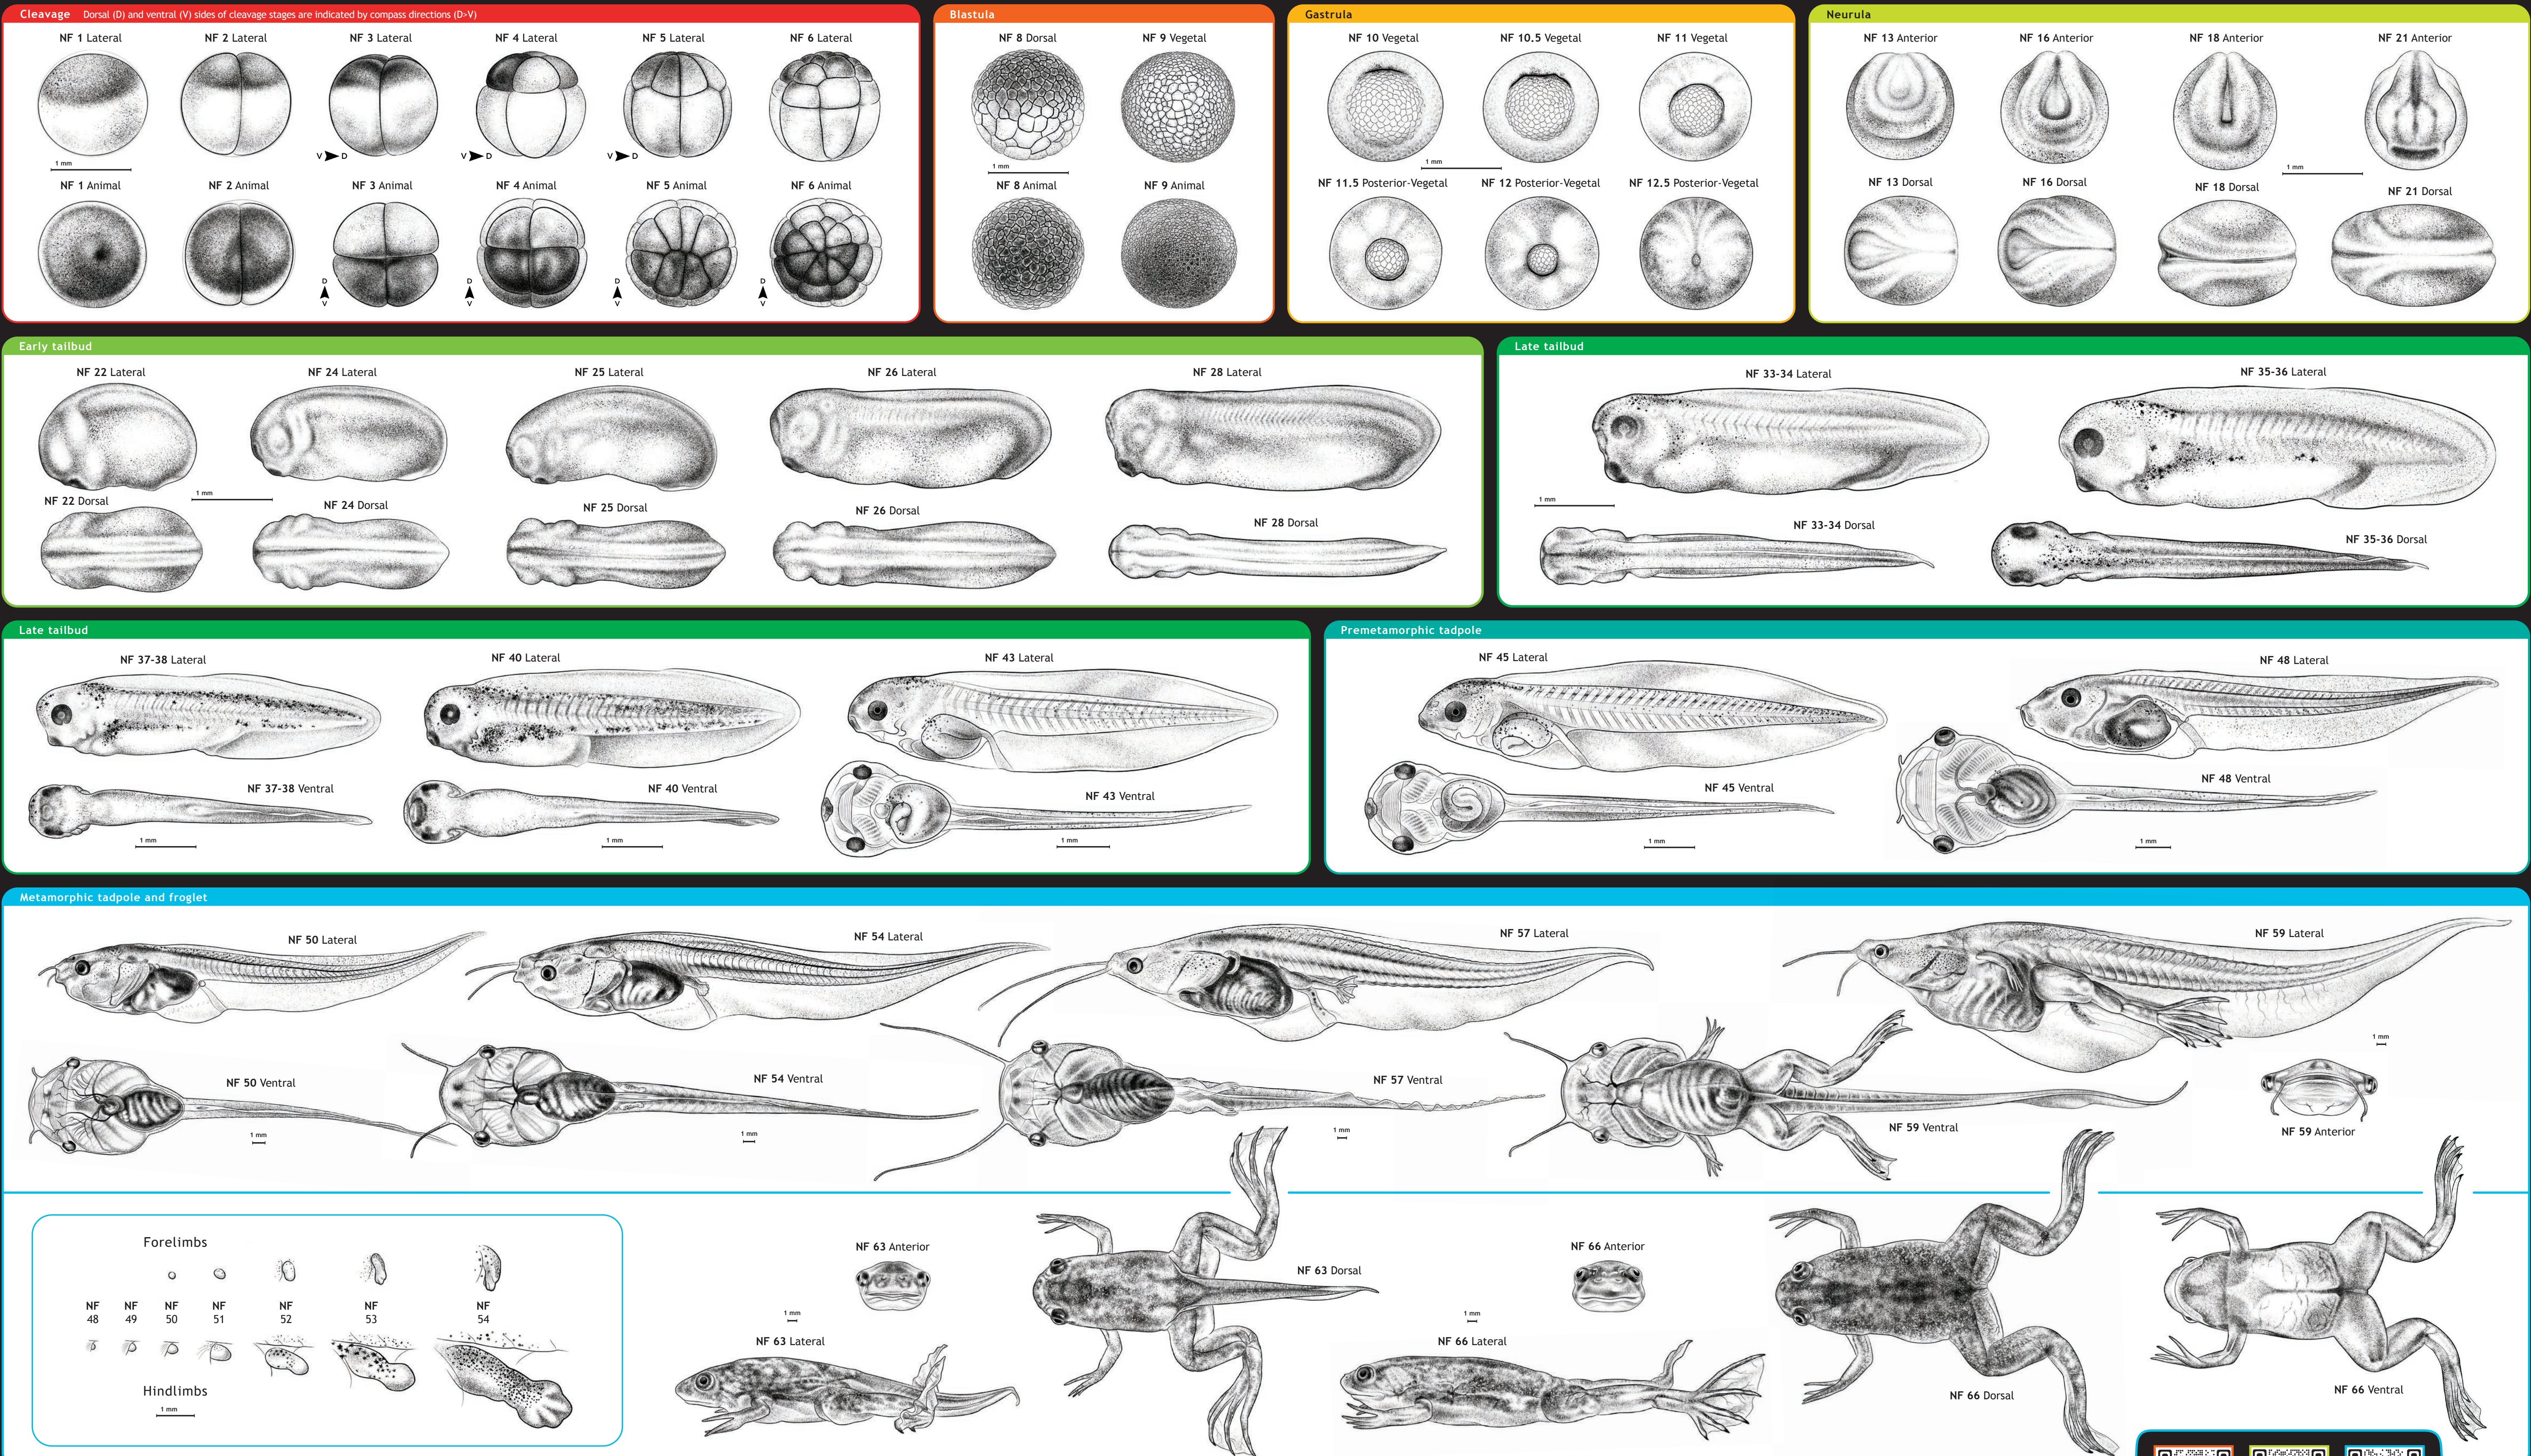

These images are to be used in conjunction with the original Nieuwkoop and Faber text, describing the anatomical transitions of *Xenopus* development (see 'Normal table of *Xenopus laevis* (Daudin): a systematical and chronological survey of the development from fertilized egg till the end of metamorphosis.' 1956, 1994).

The full set of 130 drawings, including additional views and stages, can be found on Xenbase (<https://www.xenbase.org>). See the associated Landmarks Table for key morphological features and marker gene expression that quickly and reliably distinguish

*Xenopus* embryonic stages (visit <https://www.xenbase.org/entry/landmarks-table.do>). All drawings are available for use by the research and academic community under a CC-BY-NC 4.0 license.

Poster ©2022, published by The Company of Biologists Ltd. doi: 10.1242/dev.200356 Drawings ©Natalya Zahn, available for research and academic use under a CC-BY-NC 4.0 license. Scan QR codes to access the Zahn drawings on Xenbase, the Landmarks Table on Xenbase, or the article at Development.

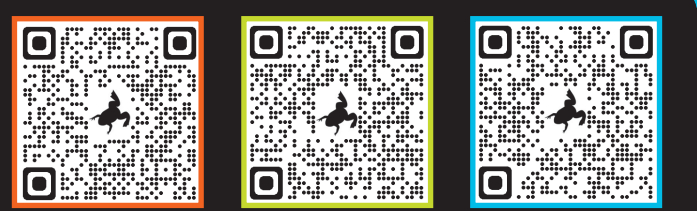

Supplement: dev200356supp1.pdf [file dev200356supp1.pdf]
